# Supplementary material for: Flecainide Is Associated With a Lower Incidence of Arrhythmic Events in a Large Cohort of Patients With Catecholaminergic Polymorphic Ventricular Tachycardia
Source: PubMed Central journal article supplement (PMC10727202; doi:10.1161/circulationaha.123.064786), 2023-10-27
Supplement: cir-148-2029-s001.pdf [file cir-148-2029-s001.pdf]

# Supplemental material

## Supplementary results

### **Analysis including the patients who had an ICD implanted within 7 days of flecainide initiation**

The first analysis included the patients who were excluded because they received an ICD within 7 days of flecainide initiation. In this analysis including 251 patients, the implantation of an ICD during any study period was still a cut-off point for determining follow-up duration as it was in our main analysis. Thus, if a patient received an ICD while being treated with beta-blocker monotherapy, the ICD implantation date was the start of the pre-flecainide period. If a patient received an ICD while being treated with a beta-blocker and flecainide, the ICD implantation date was the end of the on-flecainide period. In this analysis, 4 additional patients could be included (n=251). Three of the newly included patients had no arrhythmic events during both study periods. One patient had one arrhythmic event during the pre-flecainide period and none during the on-flecainide period. Using generalized linear mixed model (GLMM) with the assumption of a negative binomial distribution, there was a significant reduction in the rate of arrhythmic events after flecainide (IRR 0.56 [0.36-0.86], p=0.009).

### **Analysis including the patients who had an ICD implanted within 7 days of flecainide initiation *and* where the date of ICD implantation was not a cutoff point in limiting follow-up duration.**

The second supplementary analysis included the patients who were excluded because they received an ICD within 7 days of flecainide initiation *and* the implantation of an ICD during any study period was *not* a cutoff point for determining follow-up duration in this analysis. In this analysis, 251 patients were included. The median pre-flecainide follow-up duration was 2.9 years (IQR 0.6-7.6) and the median on-flecainide follow-up duration was 3.5 years (IQR 1.5-6.9). During the pre-flecainide period, 45 patients experienced 67 arrhythmic events. During the on-flecainide period, 29 patients experienced a total of 51 arrhythmic events. Using negative binomial GLMM, there was a significant reduction in the rate of arrhythmic events after flecainide (IRR 0.66 [0.45-0.96], p=0.028).

### **Characteristics of cases excluded for unequal background therapy**

A total of 142 patients were excluded based on not being on equal background therapy for at least 7 days pre and/or post-flecainide. Of these, 107 (75%) were probands. Their median age at diagnosis was 14 years (IQR 9-22). Twenty-six (18%) patients were asymptomatic before diagnosis. Thirty-nine (27%) had arrhythmic events after diagnosis. The indications for starting flecainide were CPVT-related symptoms (n=15), ventricular arrhythmia or ventricular tachycardia despite other medication

(n=66), initial therapy (n=38), patient preference (n=4), other (n=15), or unknown (n=4). In conclusion, these patients were slightly younger and more symptomatic before diagnosis and on initial therapy as compared with the study population.

## Supplementary tables

**Table S1. Commonly used  $\beta$ -blockers, their dosing and frequency regimen, and indications. Reproduced from T.M. Roston et al.<sup>18</sup>**

| $\beta$ -blocker | Route   | Frequency                                   | Starting dose, mg/kg/d | Typical adult starting dose  | Maximum dose, mg/kg/d | Typical adult maximal dose | Equivalent daily dose | Specific cardiac indications                | Common noncardiac indications                         | Additional considerations                                                                           |
|------------------|---------|---------------------------------------------|------------------------|------------------------------|-----------------------|----------------------------|-----------------------|---------------------------------------------|-------------------------------------------------------|-----------------------------------------------------------------------------------------------------|
| Acebutolol       | PO      | OD or BID                                   | 1                      | 200-400 mg divided OD or BID | 20                    | 600 mg BID                 | 200 mg/d              | HTN,* stable CAD                            | Hyperthyroidism (although other agents preferred)     | > 100 mg/d unlikely to offer further antihypertensive benefit; higher doses often needed for angina |
| Atenolol         | PO      | OD or BID                                   | 0.5                    | 25-50 mg OD                  | 2                     | 200 mg OD                  | 50 mg/d               | HTN,* MI, stable CAD                        | Hyperthyroidism (second-line)                         | Not recommended in pregnancy > 100 mg/d unlikely to offer further antihypertensive benefit          |
| Bisoprolol       | PO      | OD                                          | 0.04                   | 1.25-2.5 mg OD               | 0.14                  | 20 mg OD                   | 5 mg/d                | HFrEF, arrhythmia, HTN (second-line)*       |                                                       | May use up to 20 mg OD for hypertension; Target dose for HFrEF: 10 mg OD                            |
| Carvedilol       | PO      | BID                                         | 0.1                    | 3.125 mg BID                 | 0.7                   | 50 mg BID                  | 25 mg/d               | HFrEF, HTN (second-line),* MI with EF < 40% | Esophageal varices (second-line)                      | Target dose in HFrEF: 50 mg BID                                                                     |
| Labetalol        | PO      | BID (for large doses may divide TID or QID) | 3                      | 100 mg BID                   | 10                    | 800 mg TID                 | 200 mg/d              | HTN in pregnancy, HTN crisis,               | Subarachnoid hemorrhage                               | Safe in pregnancy                                                                                   |
| Metoprolol       | PO/I.V. | Depends on formulation                      | 1                      | 12.5-25 mg BID               | 6 (up to 400 mg/d)    | 200 mg BID                 | 100 mg/d<br>50 mg BID | HTN,* HFrEF, arrhythmia, MI, stable CAD     | Migraine (second-line), hyperthyroidism (second-line) | Safe in pregnancy, only succinate formulation                                                       |

|             |         |                        |                          |                                            |     |                                              |         |                                                                                             |                                                                                                                                     |                                                                                                                            |
|-------------|---------|------------------------|--------------------------|--------------------------------------------|-----|----------------------------------------------|---------|---------------------------------------------------------------------------------------------|-------------------------------------------------------------------------------------------------------------------------------------|----------------------------------------------------------------------------------------------------------------------------|
|             |         |                        |                          |                                            |     |                                              |         |                                                                                             |                                                                                                                                     | indicated in HFrEF                                                                                                         |
| Nadolol     | PO      | OD                     | 0.6                      | 40 mg OD                                   | 3.4 | 320 mg OD                                    | 80 mg/d | HTN,* CAD, arrhythmia, long QT syndrome                                                     | Esophageal varices; migraine                                                                                                        |                                                                                                                            |
| Nebivolol   | PO      | OD                     | 0.07                     | 5 mg OD                                    | 0.6 | 40 mg OD                                     | 10 mg/d | HFrEF, HTN (second-line)                                                                    |                                                                                                                                     | Useful in severe bronchospasm                                                                                              |
| Propranolol | PO/I.V. | Depends on formulation | 1                        | 40 mg BID                                  | 5   | 40 mg QID (arrhythmia) or 80 mg QID (angina) | 80 mg/d | Arrhythmia, long QT syndrome, HTN,* obstructive hypertrophic cardiomyopathy, stable CAD, MI | Hyperthyroidism; antipsychotic-induced akathisia (second-line), essential tremor, migraine, performance anxiety, esophageal varices | Superior to metoprolol in arrhythmic storm, used for hyperthyroidism in pregnancy                                          |
| Sotalol     | PO      | BID                    | 1                        | 40-80 mg BID                               | 4   | 160 mg BID                                   | 80 mg/d | Arrhythmia, HOCM, ARVC                                                                      |                                                                                                                                     | Useful in AF or VT with EF > 35%<br>Assess baseline QTc and creatinine before initiation; adjust dose for renal impairment |
| Esmolol     | I.V.    | Continuous infusion    | 1 (bolus); 0.05 infusion | 500 µg/kg load, then 50 µg/kg/min infusion | 0.2 | 200 µg/kg/min                                | N/A     | Intraoperative arrhythmia or arrhythmia in shock                                            | Hyperthyroidism                                                                                                                     | Rapid onset and offset are ideal in the critical care setting                                                              |

Equivalent daily dose is on the basis of an approximate conversion between the commonly prescribed doses for each type of  $\beta$ -blocker. Data are derived from Lexicomp.com, PrescribersLetter.com, BC Children's & Women's Hospital Pharmacy Formulary, Vancouver General Hospital Pharmacy Formulary, and Kaiser Permanente Formulary.

AF, atrial fibrillation; ARVC, arrhythmogenic right ventricular cardiomyopathy; BID, twice daily; CAD, coronary artery disease; EF, ejection fraction; HFrEF, heart failure with reduced ejection fraction; HOCM, hypertrophic obstructive cardiomyopathy; HTN, hypertension; I.V., intravenous; MI, myocardial infarction; N/A, not applicable; OD, once daily; PO, by mouth; QID, 4 times daily; TID, 3 times daily; VT, ventricular tachycardia.

\* Although certain  $\beta$ -blockers are approved as first- or second-line antihypertensive agents, contemporary guidelines do not support the use of  $\beta$ -blockers as a first-line option for primary HTN.

**Table S2. Characteristics of patients not treated with flecainide**

|                                                      | <b>Patients not treated with flecainide<br/>(n=944)</b> | <b>Study cohort (n=247)</b> |
|------------------------------------------------------|---------------------------------------------------------|-----------------------------|
| <b>Year of enrolment in registry, median (IQR)</b>   | 2017 (2015-2017)                                        | 2016 (2014-2017)            |
| <b>Female sex, n (%)</b>                             | 507 (54)                                                | 123 (50)                    |
| <b>Proband, n (%)</b>                                | 326 (35)                                                | 156 (63)                    |
| <b>Asymptomatic before diagnosis, n (%)</b>          | 452 (48)                                                | 83 (34)                     |
| <b>Sudden cardiac arrest before diagnosis, n (%)</b> | 72 (8)                                                  | 48 (19)                     |
| <b>Age at diagnosis, median (IQR)</b>                | 19 (11-43)                                              | 13 (9-22)                   |
| <b>Beta-blocker therapy, n (%)</b>                   | 760 (81)                                                | 247 (100)                   |
| <b>Intentional non-therapy, n (%)</b>                | 168 (18)                                                | 0 (0)                       |
| <b>ICD, n (%)</b>                                    | 203 (22)                                                | 70 (28)*                    |
| <b>LCSD, n (%)</b>                                   | 37 (4)                                                  | 21 (9)*                     |
| <b>Arrhythmic event after diagnosis, n (%)</b>       | 110 (12)                                                | 59 (24)                     |

\*ICDs implanted and LCSDs performed at baseline. ICD, implantable cardioverter-defibrillator; LCSD, left cardiac sympathetic denervation.

**Table S3. Characteristics of patients with arrhythmic events during the on-flecainide period**

|                                                             | <b>All patients (n=23)</b> | <b>Suboptimal* therapy (n=7)</b> | <b>Optimal therapy (n=16)</b> |
|-------------------------------------------------------------|----------------------------|----------------------------------|-------------------------------|
| <b>Female, n (%)</b>                                        | 10 (43)                    | 2 (29)                           | 8 (50)                        |
| <b>Mental retardation/neurologic disease, n (%)</b>         | 9 (39)                     | 1 (14)                           | 8 (50)                        |
| <b>Genotype unknown/not evaluated, n (%)</b>                | 2 (9)                      | 0                                | 2 (13)                        |
| <b>Genotype negative, n (%)</b>                             | 1 (4)                      | 0                                | 1 (6)                         |
| <b>Genotype positive</b>                                    |                            |                                  |                               |
| <i>RYR2</i> , n (%)                                         | 19 (83)                    | 7 (100)                          | 12 (75)                       |
| <i>CASQ2</i> , n (%)                                        | 1 (4)                      | 0                                | 1 (6)                         |
| <b>Worst symptom prior to diagnosis</b>                     |                            |                                  |                               |
| <b>Asymptomatic, n (%)</b>                                  | 4 (17)                     | 2 (29)                           | 2 (13)                        |
| <b>Syncope, n (%)</b>                                       | 11 (43)                    | 4 (57)                           | 7 (44)                        |
| <b>Sudden cardiac arrest, n (%)</b>                         | 8 (35)                     | 1 (14)                           | 7 (44)                        |
| <b>Age at symptom onset, years, median (IQR)</b>            | 10 (6-14)                  | 12 (11-14)                       | 9 (6-13)                      |
| <b>Age at diagnosis, years, median (IQR)</b>                | 11 (8-13)                  | 11 (8-13)                        | 11 (8-15)                     |
| <b>Age at flecainide initiation, years, median (IQR)</b>    | 13 (11-18)                 | 14 (11-22)                       | 13 (11-17)                    |
| <b>Age at first breakthrough event, years, median (IQR)</b> | 16 (13-20)                 | 15 (14-22)                       | 16 (13-20)                    |

\*Flecainide therapy was considered suboptimal when patient was non-adherent or was prescribed a low flecainide dose (<100 mg). Patients in whom information on adherence was missing were classified as adherent. Patients who experienced at least 1 arrhythmic event on an optimal dosage of flecainide and in whom non-adherence was not confirmed were classified as having optimal therapy.
